# Supplementary material for: Improved health by combining dietary restriction and promoting muscle growth in DNA repair‐deficient progeroid mice
Source: PubMed Central journal article supplement (PMC11634475; doi:10.1002/jcsm.13570), 2024-09-08

Figure S1

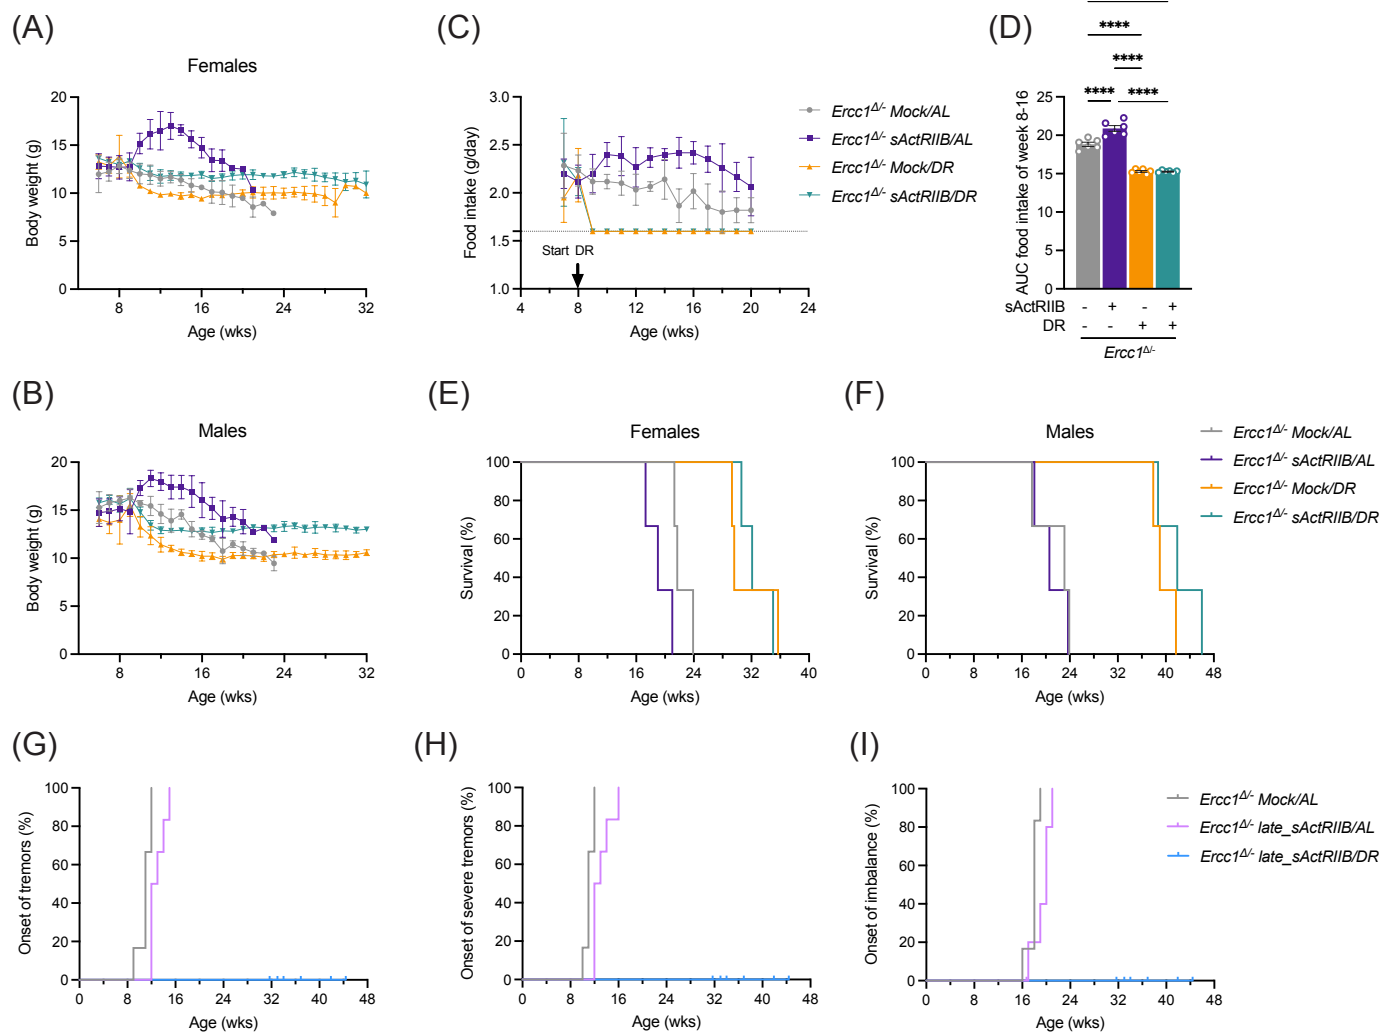

Figure S2

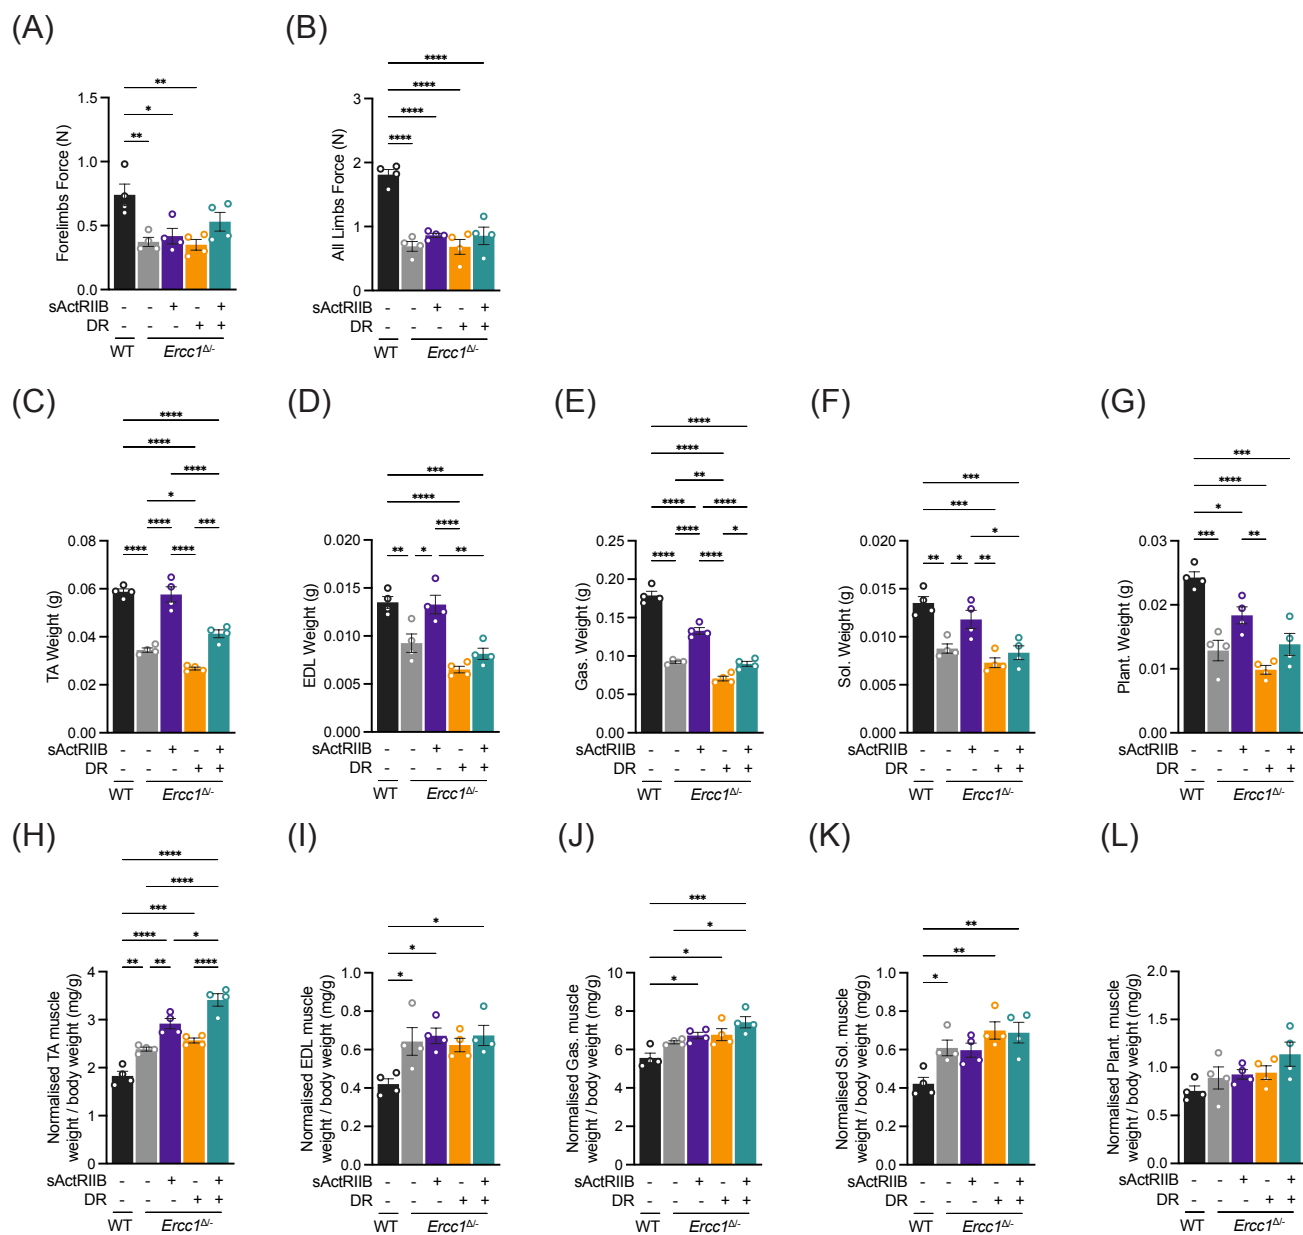

Figure S3

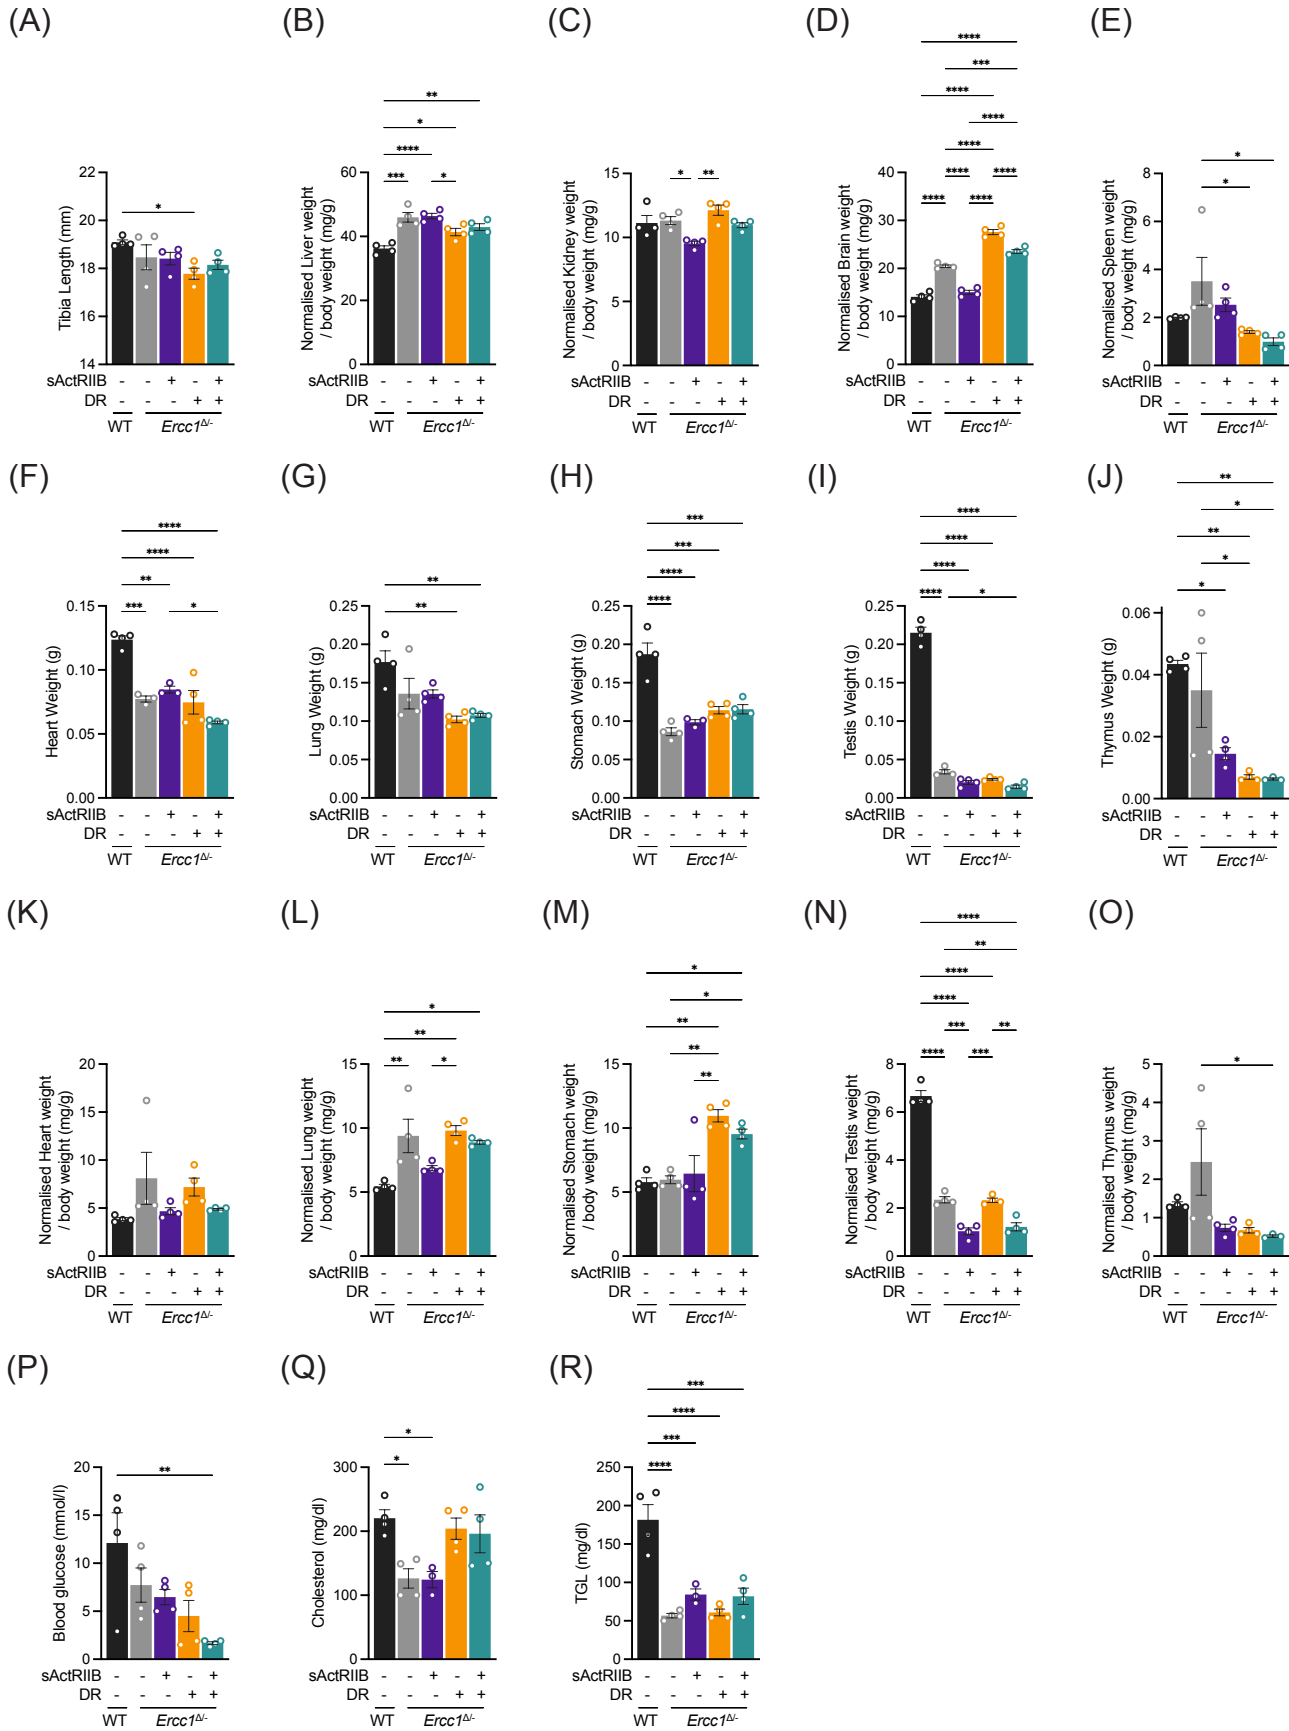

Figure S4

(A)

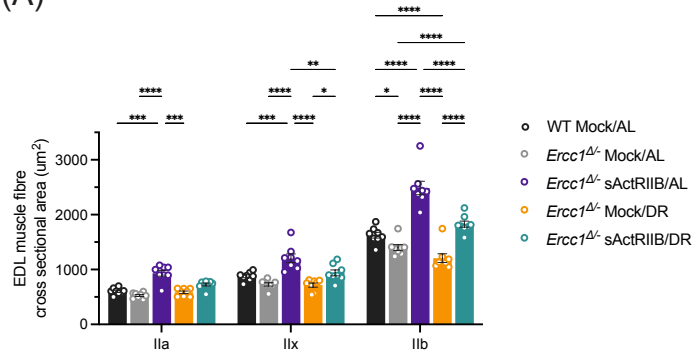

(B)

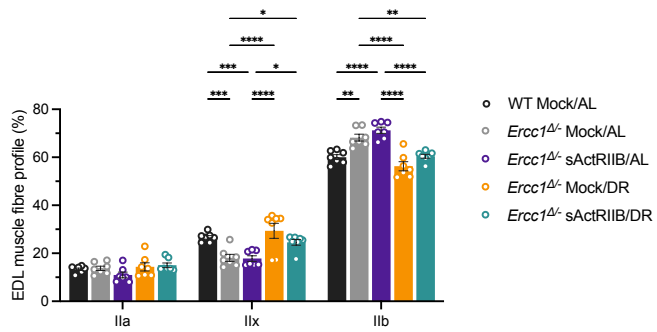

Figure S5

(A)

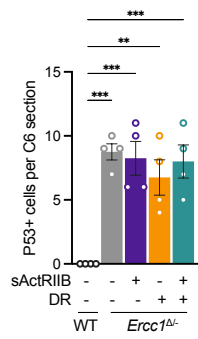

(B)

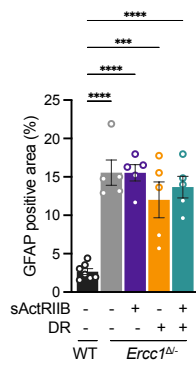

(C)

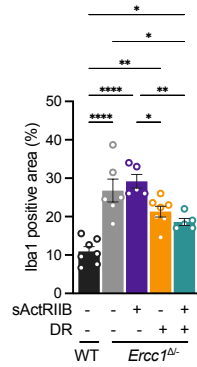

(D)

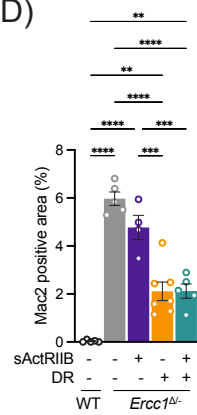

Figure S6

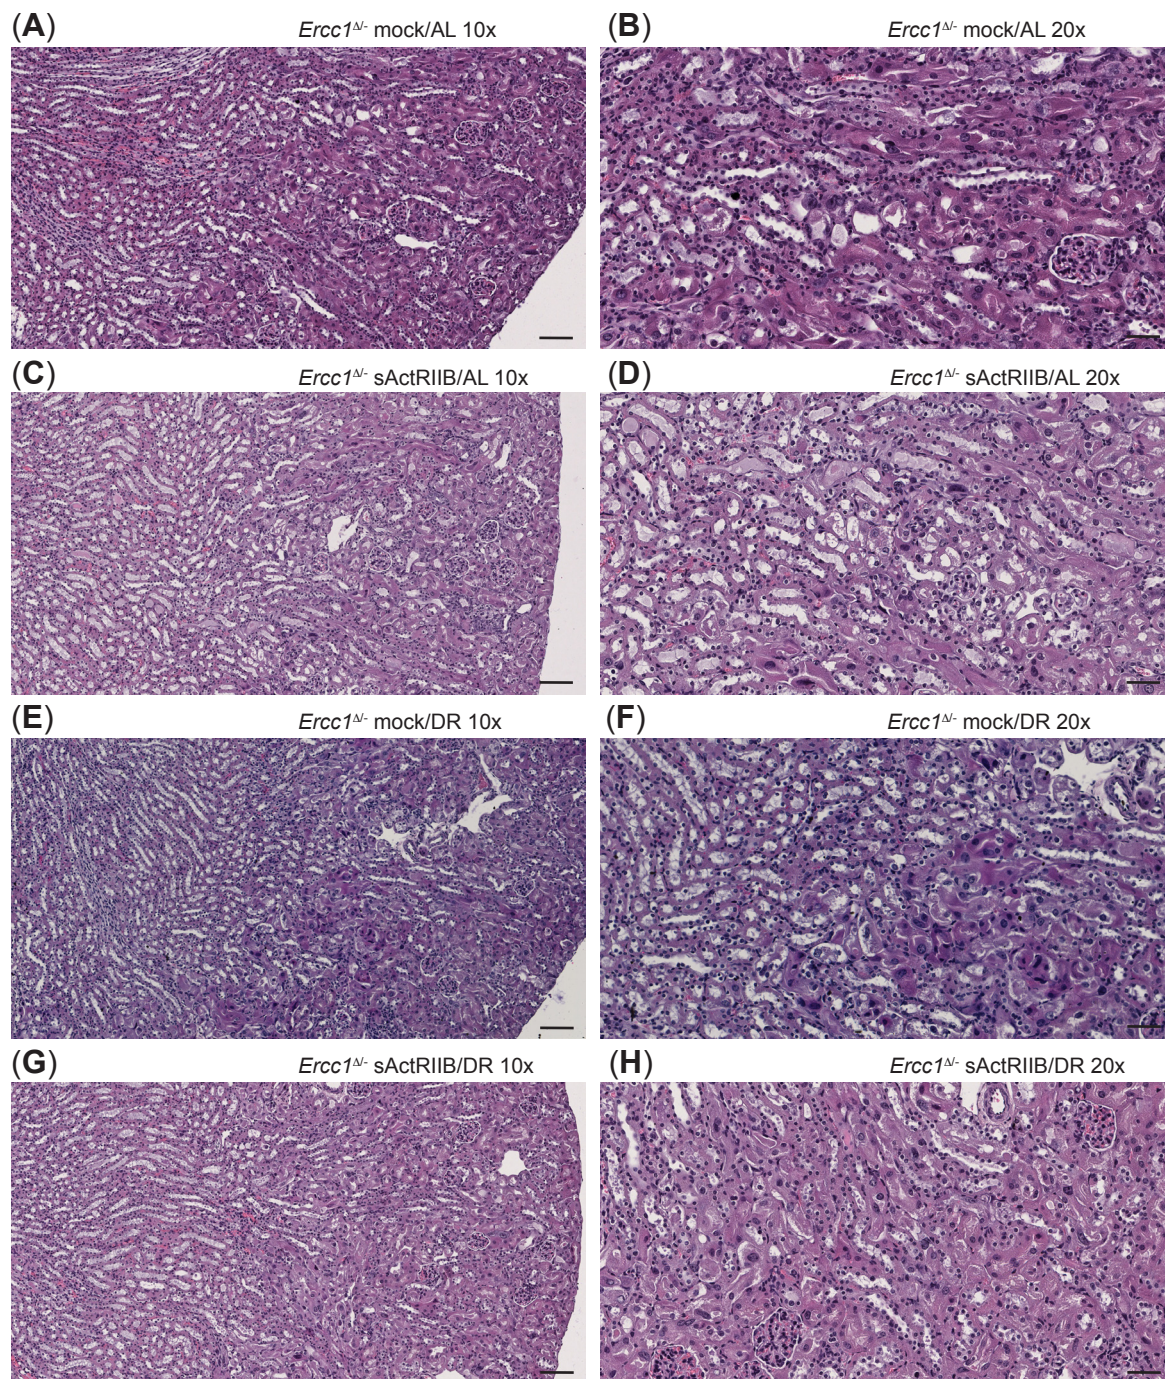

Figure S7

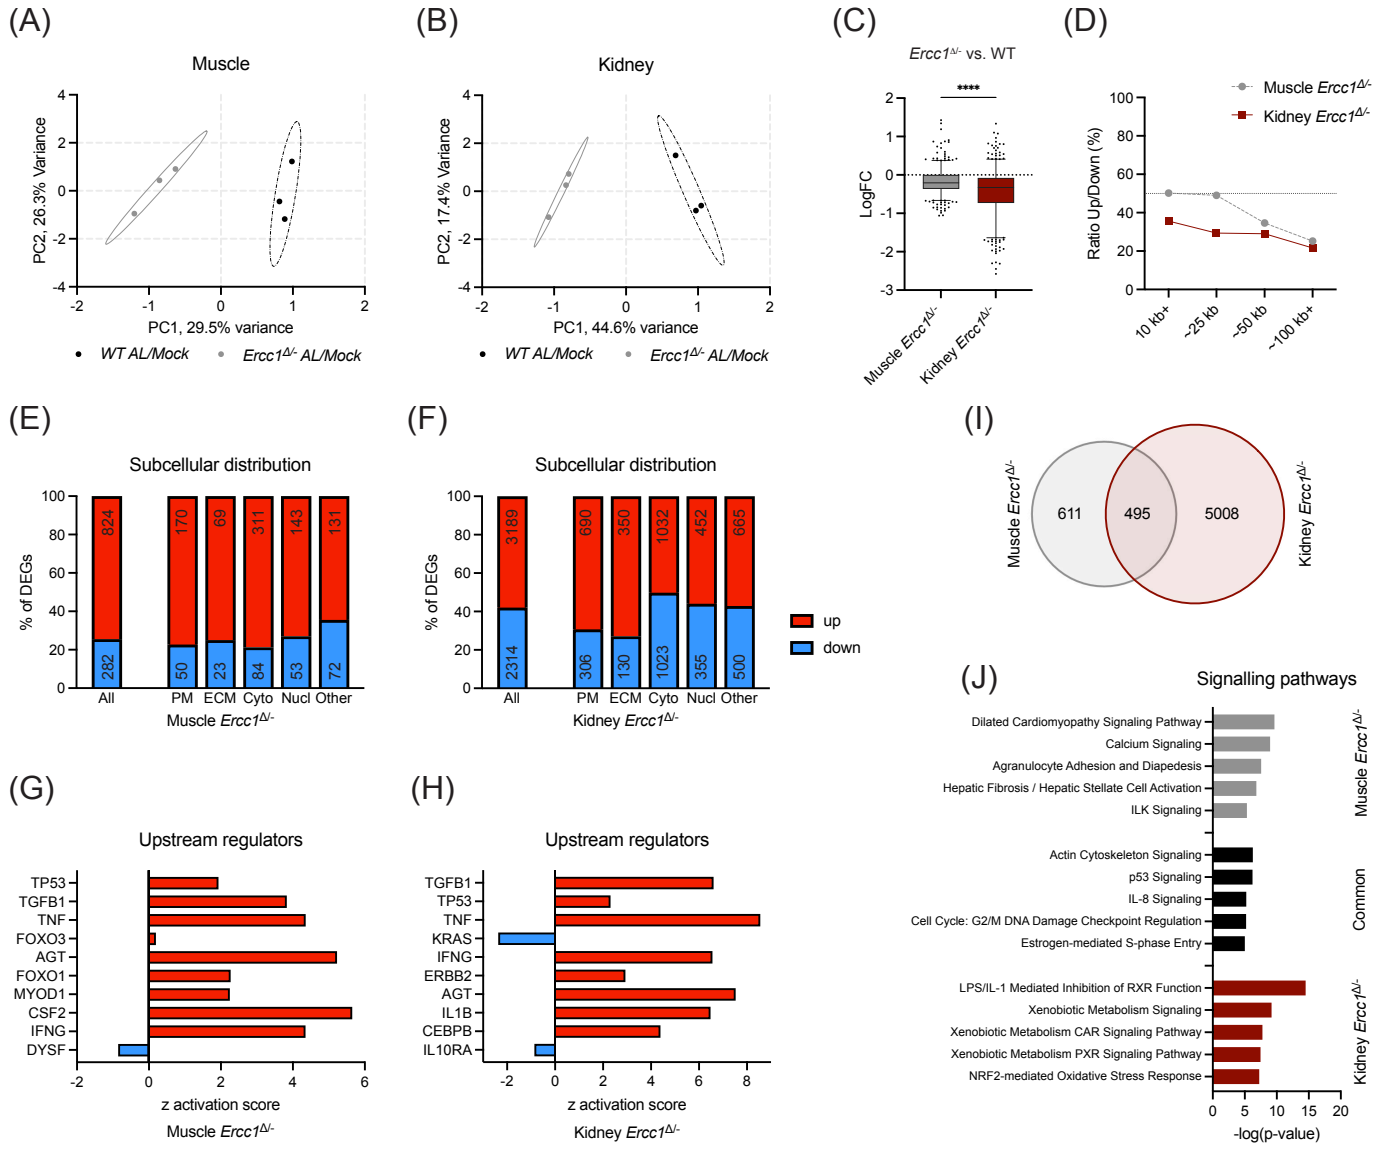

Figure S8

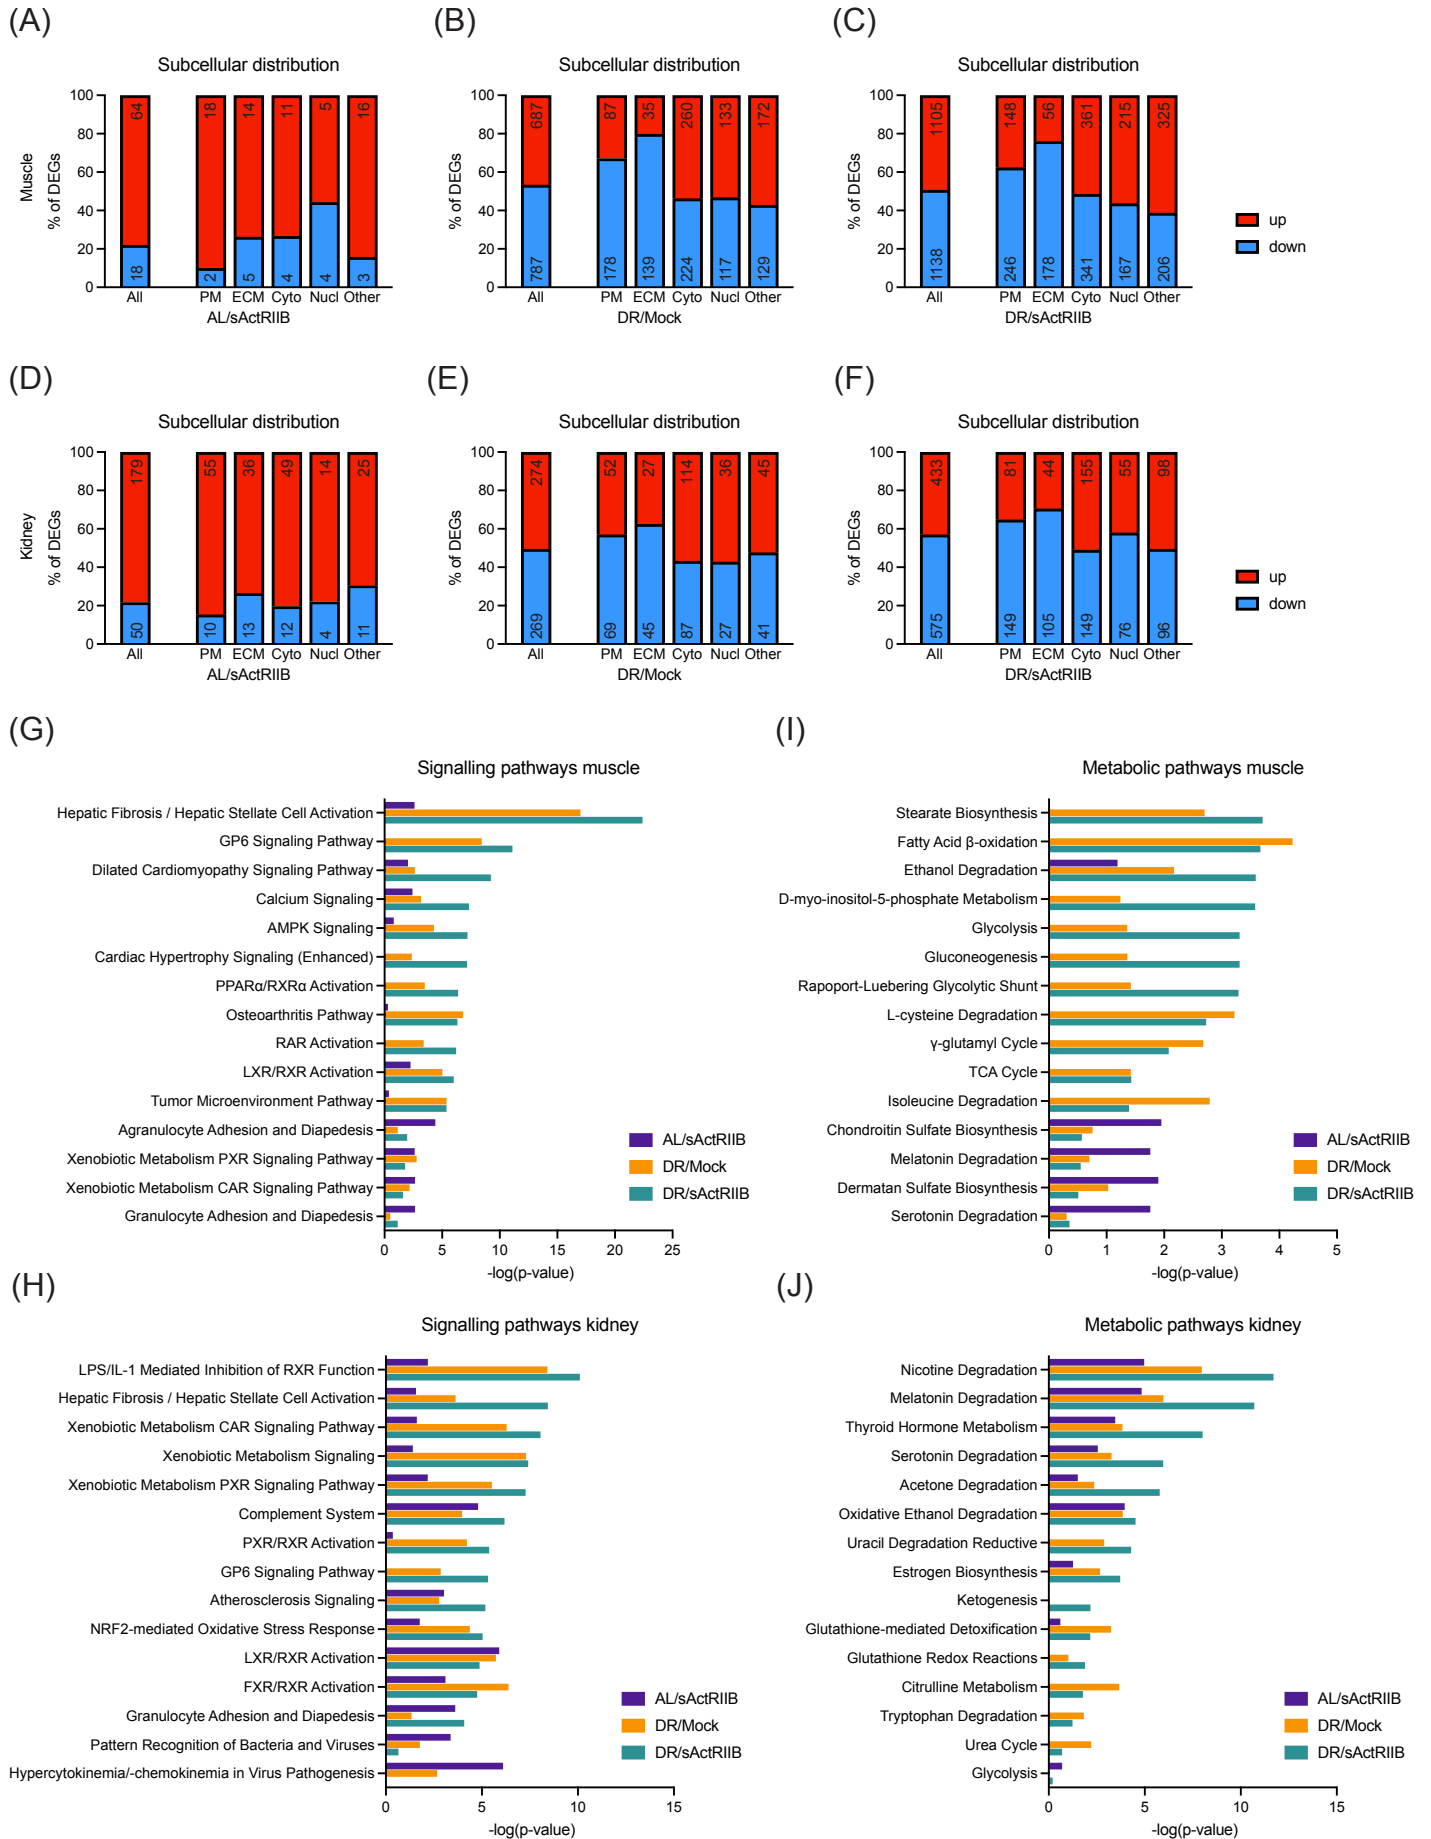

Supplement: JCSM-15-2361-s002.pdf [file JCSM-15-2361-s002.pdf]
